# Supplementary material
Source: PubMed Central journal article supplement (PMC4496623)
Supplement: IAI.00692-15_zii999091342so1.pdf [file IAI.00692-15_zii999091342so1.pdf]

1 Supplemental Figure

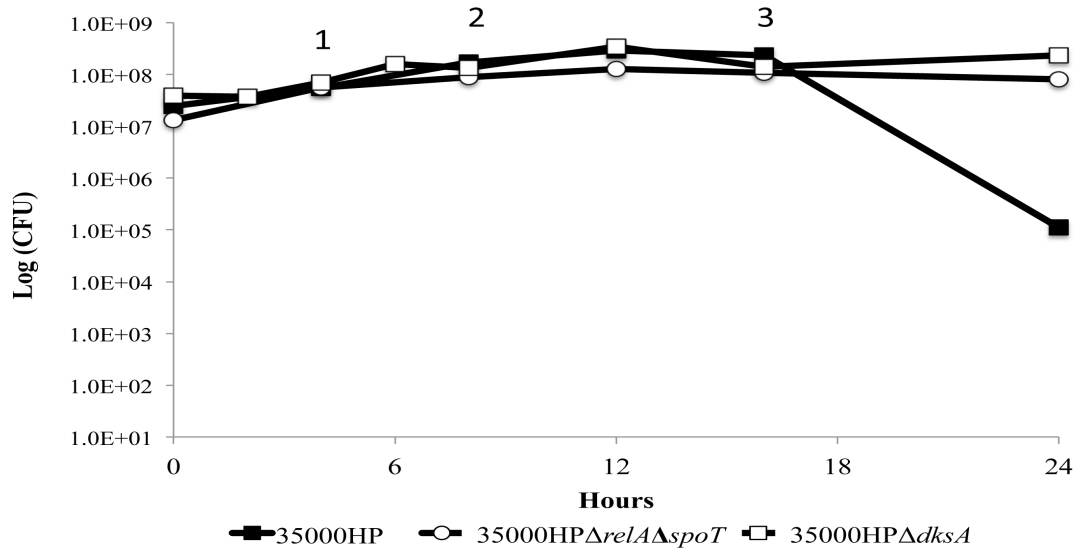

2

3 **Fig. S1.** Growth kinetics of 35000HP, 35000HPΔrelAΔspoT, and 35000HPΔdksA in GC  
4 broth. Growth kinetics were determined by measuring the colony forming units (CFU) at  
5 different time points following inoculation from overnight cultures. 1, 2, and 3 indicate  
6 the time points at which bacteria were harvested for transcriptome analysis in the mid-  
7 log, transition, and stationary growth phases, respectively.

**TABLE S1. Bacterial strains and plasmids used in this study**

| Strain(s) or plasmid                              | Description <sup>a</sup>                                                                                                                                                                               | Source or reference(s) |
|---------------------------------------------------|--------------------------------------------------------------------------------------------------------------------------------------------------------------------------------------------------------|------------------------|
| <b><i>E. coli</i> strains</b>                     |                                                                                                                                                                                                        |                        |
| DH5 $\alpha$ , Top10, and HB101                   | Strains used for general cloning procedures                                                                                                                                                            | Invitrogen             |
| DY380                                             | DH10B derivative containing a defective $\lambda$ prophage in which the <i>red</i> , <i>bet</i> , and <i>gam</i> genes are controlled by the temp-sensitive $\lambda$ cI857 repressor                  | (1)                    |
| <b><i>H. ducreyi</i> strains</b>                  |                                                                                                                                                                                                        |                        |
| 35000HP                                           | Human-passaged variant of strain 35000                                                                                                                                                                 | (2)                    |
| 35000HP $\Delta$ <i>dksA</i>                      | Unmarked, in-frame <i>dksA</i> deletion mutant                                                                                                                                                         | This study             |
| FX517                                             | 35000HP $\Delta$ <i>dsrA::cat</i> insertion mutant                                                                                                                                                     | (3)                    |
| 35000HP $\Delta$ <i>flp1-3</i>                    | Unmarked, in-frame <i>flp1-2-3</i> deletion mutant                                                                                                                                                     | (4)                    |
| 35000HP.400                                       | 35000HP $\Delta$ <i>tadA::cat</i> insertion mutant                                                                                                                                                     | (5)                    |
| 35000HP $\Delta$ <i>relA</i> $\Delta$ <i>spoT</i> | Unmarked, in-frame <i>relA</i> and <i>spoT</i> double deletion mutant                                                                                                                                  | (6)                    |
| <b>Plasmids</b>                                   |                                                                                                                                                                                                        |                        |
| pCH21                                             | pCR-XL-TOPO containing the <i>dksA</i> -coding region along with 0.5- kb flanking regions                                                                                                              | This study             |
| pRSM2832                                          | Plasmid containing spectinomycin resistance cassette flanked by the FRT sites                                                                                                                          | (7)                    |
| pRSM2072                                          | <i>H. ducreyi</i> suicide vector                                                                                                                                                                       | (8)                    |
| pRSM2975                                          | Plasmid containing the origin of replication and kanamycin-resistance gene from pLS88, FLP recombinase gene from pFT-A and a point mutation conferring a temp-sensitive phenotype in <i>H. ducreyi</i> | (9)                    |
| pACYC177                                          | Cloning vector, Kan <sup>r</sup> Amp <sup>r</sup> for complementation                                                                                                                                  | New England Biolabs    |
| pACYC184                                          | Cloning vector, Cm <sup>r</sup> Tet <sup>r</sup>                                                                                                                                                       | New England Biolabs    |
| pCH24                                             | pACYC177 containing the 35000HP <i>dksA</i> gene with the <i>cat</i> promoter from pACYC184                                                                                                            | This study             |
| pCH30                                             | pACYC177 containing the 35000HP <i>relA</i> and <i>spoT</i> gene with the <i>cat</i> promoter from pACYC184                                                                                            | (6)                    |

<sup>a</sup>Kan<sup>r</sup>, kanamycin; Amp<sup>r</sup>, ampicillin; Cm<sup>r</sup> and *cat*, chloramphenicol; and Tet<sup>r</sup>, tetracycline.

**TABLE S2. Oligonucleotides used in this study**

| Primer (gene)                      | Purpose                                                         | 5' to 3' sequence <sup>a</sup>                                                        |
|------------------------------------|-----------------------------------------------------------------|---------------------------------------------------------------------------------------|
| P1 ( <i>tbpA-dksA</i> , 5')        | RT-PCR                                                          | ACGGAAGTGGATCCAGCATTGTC                                                               |
| P2 ( <i>tbpA-dksA</i> , 3')        | RT-PCR                                                          | TAGCACGATCAGGATCAGCAA                                                                 |
| P3 ( <i>dksA-pcnB</i> , 5')        | RT-PCR                                                          | TCGTCCGACTGCGGATATGTGTAT                                                              |
| P4 ( <i>dksA-pcnB</i> , 3')        | RT-PCR                                                          | TTCGCTTTGCTAAGGCTTCACTGC                                                              |
| P5 ( <i>pcnB-folK</i> , 5')        | RT-PCR                                                          | GTTGAATTATCGGCGTGGTGGCAT                                                              |
| P6 ( <i>pcnB-folK</i> , 3')        | RT-PCR                                                          | TGTGGCCCTATTGGCTGACTACAA                                                              |
| P7 ( <i>dksA</i> amplification, F) | <i>dksA</i> ORF and 500bp upstream                              | ATATATACTAGTGGCTGCTGAATTTGAA<br>GAAGGCCA                                              |
| P8 ( <i>dksA</i> amplification, R) | <i>dksA</i> ORF and 500bp downstream                            | ATATATACTAGTCAGGTTTAGCATTAGT<br>GGCAATATCC                                            |
| P9 (Homology 1)                    | <i>dksA</i> and mutagenic cassette homology primer, Forward     | AGTTATATTCAAAGATCAGGCTGACTTA<br>TCCAACAAGGAGTGCAATTATGATTCC<br><b>GGGGATCCGTCGACC</b> |
| P10 (Homology 2)                   | <i>dksA</i> and mutagenic cassette homology primer, Reverse     | CATTGTCCATTCTATGTACCTATACTAA<br>CTAAAGCCCCATTTGTTTCTCTGTAGGC<br><b>TGGAGCTGCTTCG</b>  |
| P11 ( <i>dksA</i> , 5')            | qRT-PCR                                                         | GTGCATGGCACGTGCAAATTATGG                                                              |
| P12 ( <i>dksA</i> , 3')            | qRT-PCR                                                         | TCTTCTTGGGTAGCACGATCAGCA                                                              |
| P13 ( <i>pcnB</i> , 5')            | qRT-PCR                                                         | AGTGGGTGGGTGTATCCGTGATTT                                                              |
| P14 ( <i>pcnB</i> , 3')            | qRT-PCR                                                         | TAAATCGCACCGCGCGTAACATTC                                                              |
| P15 ( <i>dksA</i> ORF, F)          | <i>dksA</i> fragment (#2) for complement, upstream              | ATATATICTAGACAAAGATCAGGCTGAC<br>TTATCATG                                              |
| P16 ( <i>dksA</i> ORF, R)          | <i>dksA</i> fragment (#2) for complement, downstream            | ATATATICTAGAATTCCATGTACCTAT<br>ACTAACTA                                               |
| P17 ( <i>cat</i> promoter, R)      | <i>cat</i> promoter of pACYC184 for complement (#1), upstream   | CATATGATATCTAGAATATTTAGCTTCC<br>TTAGCTCCTG                                            |
| P18 ( <i>cat</i> promoter, F)      | <i>cat</i> promoter of pACYC184 for complement (#1), downstream | ATCCTGTCCGGCTGTGGCACAGGCTGAAC<br>GCCGGAGGATCCGTTGATACCGGGAAG<br>CCCTGGGCCAAC          |
| P19 ( <i>dnaE</i> , 5')            | qRT-PCR, colony hybridization                                   | AACGTTACCTTCAGCAAGCGGTTCC                                                             |
| P20 ( <i>dnaE</i> , 3')            | qRT-PCR, colony hybridization                                   | GGCGTTTGGGATCGTCGAGTGTAT                                                              |
| P21 ( <i>dksA</i> int, 5')         | mutagenesis, colony hybridization                               | TGCTGATCCTGCTGATCGTGCT                                                                |
| P22 ( <i>dksA</i> int, 3')         | mutagenesis, colony hybridization                               | TCCGCAGTCGGACGAGCTTCT                                                                 |
| P23 ( <i>lspB</i> , 5')            | qRT-PCR                                                         | AGCTAGAGCGGCTGACCCATTTAAA                                                             |
| P24 ( <i>lspB</i> , 3')            | qRT-PCR                                                         | GTGAGAAATTGCTCCGCTTTGGCT                                                              |
| P25 ( <i>flp1</i> , 5')            | qRT-PCR                                                         | GGCTTAATTGCAGTCGCAGTTGCT                                                              |
| P26 ( <i>flp1</i> , 3')            | qRT-PCR                                                         | GTGCCATTAGCGCTACTTATACCAG                                                             |
| P27 ( <i>tada</i> , 5')            | qRT-PCR                                                         | AATCAATGCCTTGCATGCGTCC                                                                |
| P28 ( <i>tada</i> , 3')            | qRT-PCR                                                         | TGTATTGGCGTGCAGGGTAGACAT                                                              |
| P29 ( <i>ccmD</i> , 5')            | qRT-PCR                                                         | CGCAGATTTCTTTGCGATGGGA                                                                |
| P30 ( <i>ccmD</i> , 3')            | qRT-PCR                                                         | CTCGGTAAGACAACCAAATTAGCCC                                                             |
| P31 ( <i>HD1577</i> , 5')          | qRT-PCR                                                         | TAAATCAAGCGCTCGCACCGAAAC                                                              |
| P32 ( <i>HD1577</i> , 3')          | qRT-PCR                                                         | AAACACACATTGTGGCGTGCCTTC                                                              |
| P33 ( <i>sapF</i> , 5')            | qRT-PCR                                                         | TATTGGGCAGATTCTTGATGCGCC                                                              |

|                           |         |                          |
|---------------------------|---------|--------------------------|
| P34 ( <i>sapF</i> , 3')   | qRT-PCR | CCCTTGCAAGTGCAATCCGTTGTT |
| P35 ( <i>HD1904</i> , 5') | qRT-PCR | AGCTAACTATTCATTAGACGACCT |
| P36 ( <i>HD1904</i> , 3') | qRT-PCR | AAGGCAATTTGTGGGAAATACT   |
| P37 ( <i>tadB</i> , 5')   | qRT-PCR | GCAACCTCTTCAGGTGTTAGT    |
| P38 ( <i>tadB</i> , 3')   | qRT-PCR | GCTTCTGCTGTCATTGCTTTC    |
| P39 ( <i>rfaD</i> , 5')   | qRT-PCR | TATATGCTTCTAGCGCGGCCACTT |
| P40 ( <i>rfaD</i> , 3')   | qRT-PCR | CGCTTGCCATCGACCCTTTATGTT |
| P41 ( <i>HD0457</i> , 5') | qRT-PCR | GCGTAATGATGGAAATGTCTCAAA |
| P42 ( <i>HD0457</i> , 3') | qRT-PCR | TCCGCTAACTCTTTAGCTTTCTT  |
| P43 ( <i>lspA1</i> , 5')  | qRT-PCR | CCGGAATTAAGTGGCTATGGT    |
| P44 ( <i>lspA1</i> , 3')  | qRT-PCR | GCGATAAGCGCGGTCAATA      |
| P45 ( <i>glpF</i> , 5')   | qRT-PCR | CGCCTGTATCGCAGAATGTAT    |
| P46 ( <i>glpF</i> , 3')   | qRT-PCR | ACAAGTGCCGAGCTAAA        |
| P47 ( <i>degP</i> , 5')   | qRT-PCR | AGGGCAAACGGTGACATCTGGTAT |
| P48 ( <i>degP</i> , 3')   | qRT-PCR | AACTCACCGCCTTTAATGCCCAAC |
| P49 ( <i>HD1218</i> , 5') | qRT-PCR | GCTCAGAGAATGAAATCACCAAAG |
| P50 ( <i>HD1218</i> , 3') | qRT-PCR | TTATCGTTGGCTAGGAGTGTTG   |
| P51 ( <i>hfq</i> , 5')    | qRT-PCR | TCGAGAGCGTATTCCCCTCTCAAT |
| P52 ( <i>hfq</i> , 3')    | qRT-PCR | TGTACGGCTTGTTGAGGAGCTTGT |

---

<sup>a</sup>Boldfaced text represents sequences with homology to the mutagenic cassette. Underlined text indicates regions corresponding to restriction enzyme sites as mentioned in the text. *H. ducreyi* sequences are from GenBank accession no. AE017143.

**Table S3: Summary of the RNA-seq read statistics**

| Bacterial Strain                 | Growth Phase | Biological Replicate | Total Reads | Aligned Reads | % Aligned Reads | % Unaligned Reads |
|----------------------------------|--------------|----------------------|-------------|---------------|-----------------|-------------------|
| 35000HP                          | Mid-Log      | R1                   | 10,301,365  | 9,429,934     | 91.54%          | 8.46%             |
|                                  |              | R2                   | 8,402,713   | 7,676,013     | 91.35%          | 8.65%             |
|                                  |              | R3                   | 10,090,817  | 9,247,646     | 91.64%          | 8.36%             |
|                                  |              | R4                   | 10,093,183  | 8,918,683     | 88.36%          | 11.64%            |
|                                  | Transition   | R1                   | 17,841,534  | 14,788,825    | 82.89%          | 17.11%            |
|                                  |              | R2                   | 12,594,439  | 11,279,753    | 89.56%          | 10.44%            |
|                                  |              | R3                   | 14,468,362  | 13,087,351    | 90.45%          | 9.55%             |
|                                  |              | R4                   | 12,585,911  | 11,724,490    | 93.16%          | 6.84%             |
|                                  | Stationary   | R1                   | 12,250,624  | 10,667,706    | 87.08%          | 12.92%            |
|                                  |              | R2                   | 13,022,098  | 11,743,715    | 90.18%          | 9.82%             |
|                                  |              | R3                   | 11,638,354  | 10,314,179    | 88.62%          | 11.38%            |
|                                  |              | R4                   | 11,745,737  | 10,479,877    | 89.22%          | 10.78%            |
| 35000HP $\Delta$ <i>relAspoT</i> | Mid-Log      | R1                   | 10,222,017  | 9,800,254     | 95.87%          | 4.13%             |
|                                  |              | R2                   | 9,464,896   | 8,611,107     | 90.98%          | 9.02%             |
|                                  |              | R3                   | 10,980,962  | 9,854,192     | 89.74%          | 10.26%            |
|                                  |              | R4                   | 10,483,047  | 9,585,534     | 91.44%          | 8.56%             |
|                                  | Transition   | R1                   | 15,068,994  | 13,809,711    | 91.64%          | 8.36%             |
|                                  |              | R2                   | 10,800,119  | 9,994,775     | 92.54%          | 7.46%             |
|                                  |              | R3                   | 12,098,519  | 10,852,532    | 89.70%          | 10.30%            |
|                                  |              | R4                   | 10,443,013  | 9,406,044     | 90.07%          | 9.93%             |
|                                  | Stationary   | R1                   | 15,008,374  | 13,617,319    | 90.73%          | 9.27%             |
|                                  |              | R2                   | 10,355,069  | 9,240,150     | 89.23%          | 10.77%            |
|                                  |              | R3                   | 11,335,796  | 10,479,164    | 92.44%          | 7.56%             |
|                                  |              | R4                   | 8,205,523   | 7,542,286     | 91.92%          | 8.08%             |
| 35000HP $\Delta$ <i>dkoA</i>     | Mid-Log      | R1                   | 13,075,344  | 11,631,470    | 88.96%          | 11.04%            |
|                                  |              | R2                   | 11,369,827  | 10,089,573    | 88.74%          | 11.26%            |
|                                  |              | R3                   | 15,429,356  | 14,230,161    | 92.23%          | 7.77%             |
|                                  |              | R4                   | 15,350,792  | 13,965,504    | 90.98%          | 9.02%             |
|                                  | Transition   | R1                   | 13,698,233  | 12,967,727    | 94.67%          | 5.33%             |
|                                  |              | R2                   | 12,114,949  | 11,048,993    | 91.20%          | 8.80%             |
|                                  |              | R3                   | 10,500,995  | 9,431,736     | 89.82%          | 10.18%            |
|                                  |              | R4                   | 11,307,711  | 10,317,164    | 91.24%          | 8.76%             |
|                                  | Stationary   | R1                   | 13,934,290  | 12,469,947    | 89.49%          | 10.51%            |
|                                  |              | R2                   | 13,181,478  | 12,347,374    | 93.67%          | 6.33%             |
|                                  |              | R3                   | 12,793,798  | 11,909,717    | 93.09%          | 6.91%             |
|                                  |              | R4                   | 13,875,693  | 12,545,996    | 90.42%          | 9.58%             |

## SUPPLEMENTAL REFERENCES

1. **Lee EC, Yu D, Martinez de Velasco J, Tessarollo L, Swing DA, Court DL, Jenkins NA, Copeland NG.** 2001. A highly efficient *Escherichia coli*-based chromosome engineering system adapted for recombinogenic targeting and subcloning of BAC DNA. *Genomics* **73**:56-65.
2. **Al-Tawfiq JA, Thornton AC, Katz BP, Fortney KR, Todd KD, Hood AF, Spinola SM.** 1998. Standardization of the experimental model of *Haemophilus ducreyi* infection in human subjects. *J. Infect. Dis.* **178**:1684-1687.
3. **Elkins C, Morrow KJ, Olsen B.** 2000. Serum resistance in *Haemophilus ducreyi* requires outer membrane protein *DsrA*. *Infect. Immun.* **68**:1608-1619.
4. **Janowicz DM, Cooney SA, Walsh J, Baker B, Katz BP, Fortney KR, Zwickl B, Ellinger S, Munson J, R. S.** 2011. Expression of the flp proteins by *Haemophilus ducreyi* is necessary for virulence in human volunteers. *BMC Microbiology* **11**:208.
5. **Spinola SM, Fortney KR, Katz BP, Latimer JL, Mock JR, Vakevainen M, Hansen EJ.** 2003. *Haemophilus ducreyi* requires an intact *flp* gene cluster for virulence in humans. *Infect. Immun.* **71**:7178-7182.
6. **Holley C, Gangaiah D, Li W, Fortney KR, Janowicz DM, Ellinger S, Zwickl B, Katz BP, Spinola SM.** 2014. A (p)ppGpp-Null Mutant of *Haemophilus ducreyi* Is Partially Attenuated in Humans Due to Multiple Conflicting Phenotypes. *Infection and immunity* **82**:3492-3502.
7. **Tracy E, Ye F, Baker BD, Munson RS, Jr.** 2008. Construction of non-polar mutants in *Haemophilus influenzae* using FLP recombinase technology. *BMC Molecular Biology* **9**:101.
8. **Bozue JA, Tarantino L, Munson RS, Jr.** 1998. Facile construction of mutations in *Haemophilus ducreyi* using *lacZ* as a counter-selectable marker. *FEMS Microbiol. Lett.* **164**:269-273.
9. **Spinola SM, Fortney KR, Baker B, Janowicz DM, Zwickl B, Katz BP, Blick RJ, Munson RS, Jr.** 2010. Activation of the CpxRA system by deletion of *cpxA* impairs the ability of *Haemophilus ducreyi* to infect humans. *Infection and immunity* **78**:3898-3904.

**Table S4: Functional Classification of Genes differentially expressed by deletion of either (p)ppGpp or DksA In Mid-Log, Transition, or Stationary Phase.**

| Functional Category <sup>a</sup>           | Gene          | Description or homolog                                                                      | 35000HPΔ <i>relA</i> Δ <i>spoT</i> / 35000HP <sup>b</sup> |            |            | 35000HPΔ <i>dksA</i> / 35000HP <sup>c</sup> |            |            |
|--------------------------------------------|---------------|---------------------------------------------------------------------------------------------|-----------------------------------------------------------|------------|------------|---------------------------------------------|------------|------------|
|                                            |               |                                                                                             | Mid- Log                                                  | Transition | Stationary | Mid- Log                                    | Transition | Stationary |
| <b>Amino acid biosynthesis</b>             |               |                                                                                             |                                                           |            |            |                                             |            |            |
|                                            | <i>arcB1</i>  | Ornithine carbamoyltransferase                                                              | -2.67                                                     | -2.61      |            |                                             |            |            |
|                                            | <i>argB</i>   | Acetylglutamate kinase                                                                      |                                                           |            | -2.07      |                                             |            | -2.24      |
|                                            | <i>asd</i>    | Aspartate-semialdehyde dehydrogenase                                                        |                                                           |            |            | 2.79                                        | 3.49       | 3.53       |
|                                            | <i>cysZ</i>   | Sulfate transporter, CysZ-type                                                              |                                                           |            |            |                                             |            | 3.26       |
|                                            | <i>dapD</i>   | 2,3,4,5-tetrahydropyridine-2,6-dicarboxylate N-succinyltransferase                          |                                                           |            |            |                                             |            | 2.06       |
|                                            | <i>glnA</i>   | Glutamine synthetase type I                                                                 |                                                           |            |            |                                             | 2.32       | 3.44       |
|                                            | <i>HD1666</i> | Probable phosphatase                                                                        |                                                           |            | -2.35      |                                             |            |            |
|                                            | <i>lysC</i>   | Aspartokinase                                                                               |                                                           |            | 2.40       |                                             |            |            |
|                                            | <i>pheA</i>   | Chorismate mutase I / Prephenate dehydratase                                                |                                                           |            | 2.99       |                                             |            | 3.02       |
|                                            | <i>pyrD</i>   | Dihydroorotate dehydrogenase                                                                | -2.03                                                     | -2.38      |            |                                             |            |            |
|                                            | <i>pyrE</i>   | Orotate phosphoribosyltransferase                                                           |                                                           |            | -3.76      |                                             |            |            |
|                                            | <i>pyrF</i>   | Orotidine 5'-phosphate decarboxylase                                                        |                                                           |            | -3.46      |                                             |            |            |
| <b>Amino acid Transport and Metabolism</b> |               |                                                                                             |                                                           |            |            |                                             |            |            |
|                                            | <i>aspA</i>   | Aspartate ammonia-lyase                                                                     | 3.06                                                      |            |            |                                             | -2.90      |            |
|                                            | <i>brnQ</i>   | Branched-chain amino acid carrier protein                                                   |                                                           |            | -2.40      |                                             |            | -2.65      |
|                                            | <i>carA</i>   | Carbamoyl-phosphate synthase, small subunit                                                 | -4.29                                                     | -5.68      |            |                                             |            |            |
|                                            | <i>carB</i>   | Carbamoyl-phosphate synthase, large subunit                                                 | -3.97                                                     | -4.05      |            |                                             |            |            |
|                                            | <i>cysK</i>   | Cysteine synthase                                                                           | -3.04                                                     |            |            |                                             |            |            |
|                                            | <i>dat</i>    | Diaminobutyrate--2-oxoglutarate aminotransferase                                            |                                                           |            |            | 3.80                                        | 4.90       | 2.81       |
|                                            | <i>ddc</i>    | L-2,4-diaminobutyrate decarboxylase                                                         |                                                           |            |            | 3.06                                        | 3.16       |            |
|                                            | <i>HD1348</i> | Nucleoside 5-triphosphatase RdgB (dHATP, dITP, XTP-specific)                                |                                                           |            | -2.16      |                                             |            |            |
|                                            | <i>mazG</i>   | Nucleoside triphosphate pyrophosphohydrolase MazG                                           |                                                           |            | 3.68       |                                             |            | 3.44       |
|                                            | <i>nrdB</i>   | Ribonucleotide reductase of class Ia (aerobic), beta subunit                                |                                                           |            | 2.04       |                                             |            |            |
|                                            | <i>nudE</i>   | ADP compounds hydrolase                                                                     |                                                           |            | 3.52       |                                             |            | 2.88       |
|                                            | <i>pntA</i>   | NAD(P) transhydrogenase alpha subunit                                                       | -2.39                                                     |            | -2.53      |                                             |            |            |
|                                            | <i>pntB</i>   | NAD(P) transhydrogenase subunit beta                                                        | -2.50                                                     |            | -2.04      |                                             | -2.44      |            |
|                                            | <i>potD1</i>  | Spermidine/putrescine-binding periplasmic protein (SPBP)                                    | 2.45                                                      |            |            | 2.58                                        | 3.01       | 6.12       |
|                                            | <i>potD2</i>  | ABC transporter, periplasmic spermidine putrescine-binding protein                          |                                                           |            | 7.01       |                                             |            | 5.06       |
|                                            | <i>purA</i>   | Adenylosuccinate synthetase                                                                 | -2.52                                                     |            | -2.24      |                                             |            |            |
|                                            | <i>purM</i>   | Phosphoribosylformylglycinamide cyclo-ligase                                                |                                                           |            | 2.58       |                                             |            | 2.36       |
|                                            | <i>sdaC</i>   | Serine transporter                                                                          | 2.22                                                      |            |            |                                             |            |            |
|                                            | <i>sucA</i>   | 2-oxoglutarate dehydrogenase E1 component                                                   | -4.38                                                     |            |            |                                             |            |            |
|                                            | <i>sucB</i>   | Dihydrolipoamide succinyltransferase component (E2) of 2-oxoglutarate dehydrogenase complex | -5.83                                                     |            |            |                                             |            |            |
|                                            | <i>upp</i>    | Uracil phosphoribosyltransferase                                                            | -2.26                                                     |            | -6.29      |                                             |            | -3.76      |
|                                            | <i>uraA</i>   | Uracil permease                                                                             |                                                           | -2.17      | 5.77       |                                             |            | 5.07       |

**Table S4: Functional Classification of Genes differentially expressed by deletion of either (p)ppGpp or DksA In Mid-Log, Transition, or Stationary Phase.**

| Functional Category <sup>a</sup>                  | Gene          | Description or homolog                                             | 35000HPΔrelAΔspoT / 35000HP <sup>b</sup> |            |            | 35000HPΔdksA / 35000HP <sup>c</sup> |            |            |
|---------------------------------------------------|---------------|--------------------------------------------------------------------|------------------------------------------|------------|------------|-------------------------------------|------------|------------|
|                                                   |               |                                                                    | Fold-Change                              |            |            | Fold-Change                         |            |            |
|                                                   |               |                                                                    | Mid- Log                                 | Transition | Stationary | Mid- Log                            | Transition | Stationary |
| <b>Amino Sugar and nucleotide metabolism</b>      |               |                                                                    |                                          |            |            |                                     |            |            |
|                                                   | <i>apt</i>    | Adenine phosphoribosyltransferase                                  |                                          |            | 4.56       |                                     |            | 3.87       |
|                                                   | <i>apbE</i>   | Thiamin biosynthesis lipoprotein                                   |                                          |            | -2.29      |                                     |            |            |
|                                                   | <i>dxs</i>    | 1-deoxy-D-xylulose 5-phosphate synthase                            |                                          |            | -2.09      |                                     |            |            |
|                                                   | <i>glmU</i>   | Glucosamine-1-phosphate N-acetyltransferase                        | -2.60                                    |            |            |                                     |            |            |
|                                                   | <i>kdsA</i>   | 2-Keto-3-deoxy-D-manno-octulosonate-8-phosphate synthase           |                                          |            | -2.60      |                                     |            | -2.16      |
|                                                   | <i>manA</i>   | Mannose-6-phosphate isomerase                                      |                                          | 2.30       |            |                                     |            |            |
|                                                   | <i>manX</i>   | Mannose-specific phosphotransferase IIAB component                 |                                          |            | -8.60      |                                     |            | -5.21      |
|                                                   | <i>manY</i>   | Mannose-specific phosphotransferase system IIC component           |                                          | 2.35       | -8.36      |                                     |            | -6.35      |
|                                                   | <i>manZ</i>   | Mannose-specific phosphotransferase system IID component           |                                          | 2.56       | -4.18      |                                     |            | -3.27      |
|                                                   | <i>moaC</i>   | Molybdenum cofactor biosynthesis protein                           |                                          |            |            |                                     |            | -2.05      |
|                                                   | <i>moaD</i>   | Molybdenum cofactor biosynthesis protein                           |                                          |            | -2.81      |                                     |            | -2.52      |
|                                                   | <i>murA</i>   | UDP-N-acetylglucosamine 1-carboxyvinyltransferase                  | -2.95                                    |            | 2.71       |                                     |            |            |
|                                                   | <i>nagA</i>   | N-acetylglucosamine-6-phosphate deacetylase                        |                                          |            | -2.12      |                                     |            |            |
|                                                   | <i>nanE</i>   | N-acetylmannosamine-6-phosphate 2-epimerase                        |                                          |            | -2.73      |                                     |            | -2.96      |
|                                                   | <i>pta</i>    | Phosphate acetyltransferase                                        |                                          |            | -2.34      |                                     |            |            |
|                                                   | <i>ribH</i>   | 6,7-dimethyl-8-ribityllumazine synthase                            |                                          |            | -2.54      |                                     |            |            |
|                                                   | <i>thiL</i>   | Thiamine-monophosphate kinase                                      | -2.59                                    | -2.19      | -2.31      |                                     |            |            |
|                                                   | <i>thyA</i>   | Thymidylate synthase                                               |                                          |            | 4.53       |                                     |            | 2.24       |
|                                                   | <i>uppS</i>   | Undecaprenyl pyrophosphate synthetase                              |                                          |            | 3.58       |                                     |            |            |
|                                                   | <i>wecC</i>   | UDP-glucose dehydrogenase                                          | -2.16                                    |            |            |                                     |            |            |
| <b>Cellular Carbohydrate Biosynthetic Process</b> |               |                                                                    |                                          |            |            |                                     |            |            |
|                                                   | <i>alr</i>    | Alanine racemase                                                   |                                          |            | 2.23       |                                     |            |            |
|                                                   | <i>araD</i>   | L-ribulose-5-phosphate 4-epimerase                                 |                                          | 2.27       |            |                                     |            |            |
|                                                   | <i>eno</i>    | Phosphopyruvate hydratase                                          |                                          |            | 3.42       |                                     | -2.16      | 3.48       |
|                                                   | <i>fbp</i>    | Fructose-1,6-bisphosphatase, type I                                |                                          | 2.09       |            |                                     |            |            |
|                                                   | <i>frdC</i>   | Fumarate reductase subunit C                                       |                                          |            | -10.48     |                                     |            | -5.81      |
|                                                   | <i>frdD</i>   | Fumarate reductase subunit D                                       |                                          | 3.01       | -2.59      |                                     |            |            |
|                                                   | <i>gmhA</i>   | Phosphoheptose isomerase I                                         |                                          |            | 2.09       |                                     |            |            |
|                                                   | <i>HD0112</i> | Negative regulator of beta-lactamase expression                    |                                          |            |            |                                     | 3.22       |            |
|                                                   | <i>HD0297</i> | 3-deoxy-D-manno-octulosonate 8-phosphate phosphatase               |                                          |            | 2.36       |                                     |            |            |
|                                                   | <i>HD0746</i> | Hypothetical protein                                               |                                          |            |            | 2.50                                | 2.28       | 4.93       |
|                                                   | <i>HD0922</i> | Tfp pilus assembly protein, pilus retraction ATPase PilT           |                                          |            |            |                                     | 3.04       |            |
|                                                   | <i>kdkA</i>   | 3-deoxy-D-manno-octulosonic acid kinase                            |                                          |            | 2.09       |                                     |            |            |
|                                                   | <i>lsgD</i>   | Lipopolysaccharide core biosynthesis glycosyltransferase WadA      |                                          |            |            |                                     | 2.04       |            |
|                                                   | <i>murD</i>   | UDP-N-acetylmuramoylalanine--D-glutamate ligase                    |                                          |            | -2.74      |                                     |            |            |
|                                                   |               | UDP-N-acetylmuramoylalanyl-D-glutamate--2,6-diaminopimelate ligase |                                          |            | -2.47      |                                     |            |            |
|                                                   | <i>murE</i>   | ligase                                                             |                                          |            | -2.47      |                                     |            |            |
|                                                   | <i>neuA</i>   | N-Acetylneuraminate cytidyltransferase                             |                                          |            | 2.74       |                                     |            |            |
|                                                   | <i>pckA</i>   | Phosphoenolpyruvate carboxykinase [ATP]                            |                                          |            | -2.60      |                                     |            |            |
|                                                   | <i>rpiA</i>   | Ribose 5-phosphate isomerase A                                     |                                          |            |            |                                     | 2.92       | 2.22       |



**Table S4: Functional Classification of Genes differentially expressed by deletion of either (p)ppGpp or DksA In Mid-Log, Transition, or Stationary Phase.**

| Functional Category <sup>a</sup> | Gene                                                  | Description or homolog                                                            | 35000HPΔrelAΔspoT / 35000HP <sup>b</sup> |            |            | 35000HPΔdksA / 35000HP <sup>c</sup> |            |            |
|----------------------------------|-------------------------------------------------------|-----------------------------------------------------------------------------------|------------------------------------------|------------|------------|-------------------------------------|------------|------------|
|                                  |                                                       |                                                                                   | Fold-Change                              |            |            | Fold-Change                         |            |            |
|                                  |                                                       |                                                                                   | Mid- Log                                 | Transition | Stationary | Mid- Log                            | Transition | Stationary |
| Carbohydrate Metabolism          | <i>sgbU</i>                                           | L-xylulose 5-phosphate 3-epimerase                                                |                                          | 2.07       |            |                                     |            |            |
|                                  | <i>tpiA</i>                                           | Triosephosphate isomerase                                                         |                                          |            | 2.13       |                                     |            |            |
|                                  | <i>aceF</i>                                           | Dihydro-lipoamide acetyltransferase                                               |                                          |            |            |                                     |            |            |
|                                  | <i>ampD</i>                                           | N-acetylmuramoyl-L-alanine amidase                                                |                                          |            |            |                                     |            | 2.24       |
|                                  | <i>csrA</i>                                           | Carbon storage regulator                                                          |                                          |            |            |                                     |            |            |
|                                  | <i>rfaD</i>                                           | ADP-L-glycero-D-manno-heptose-6-epimerase                                         |                                          |            |            |                                     |            | 2.06       |
| Cell Division                    | <i>suhB</i>                                           | Inositol-1-monophosphatase                                                        |                                          |            |            |                                     |            | 2.44       |
|                                  | <i>ftsI</i>                                           | Peptidoglycan synthetase                                                          |                                          |            |            |                                     |            |            |
|                                  | <i>ftsL</i>                                           | Cell division protein                                                             |                                          |            |            |                                     |            | -3.14      |
|                                  | <i>ftsW</i>                                           | Cell division protein                                                             |                                          |            |            |                                     |            | -2.11      |
|                                  | <i>HD1001</i>                                         | Z-ring-associated protein ZapA                                                    |                                          |            |            |                                     |            | 2.02       |
|                                  | <i>HD1472</i>                                         | Conserved hypothetical protein                                                    |                                          |            |            |                                     |            |            |
|                                  | <i>ispZ</i>                                           | Intracellular septation protein IspA                                              |                                          |            |            |                                     |            |            |
|                                  | <i>mreC</i>                                           | Rod shape-determining protein                                                     |                                          |            |            |                                     |            |            |
| Cell Membrane                    | <i>cdsA</i>                                           | Phosphatidate cytidyltransferase                                                  |                                          |            |            |                                     |            |            |
|                                  | <i>cdtA</i>                                           | Cytolethal distending toxin protein A                                             | -2.49                                    |            |            |                                     |            |            |
|                                  | <i>cdtB</i>                                           | Cytolethal distending toxin protein B                                             | -2.79                                    |            | -2.59      |                                     |            | -2.62      |
|                                  | <i>cdtC</i>                                           | Cytolethal distending toxin protein C                                             | -3.25                                    |            | -2.93      |                                     |            | -2.47      |
|                                  | <i>creB</i>                                           | putative fluoride ion transporter                                                 |                                          |            | -2.15      |                                     |            |            |
|                                  | <i>dppB</i>                                           | Dipeptide transport system permease protein                                       |                                          |            | -2.22      |                                     |            |            |
|                                  | <i>dppC</i>                                           | Dipeptide transport system permease protein                                       |                                          |            | -2.21      |                                     |            |            |
|                                  | <i>dsbB</i>                                           | Periplasmic thiol:disulfide oxidoreductase                                        |                                          |            | 2.14       |                                     |            |            |
|                                  | <i>dsrA</i>                                           | serum resistance protein                                                          |                                          |            |            |                                     |            |            |
|                                  | <i>fimA</i>                                           | Possible fimbrial major pilin protein                                             | 3.00                                     | 3.30       | 2.79       | 3.55                                | -2.06      | 2.44       |
|                                  | <i>fimB</i>                                           | Possible fimbrial structural subunit                                              | 2.38                                     | 2.15       | 3.04       | 2.61                                |            | 2.48       |
|                                  | <i>flp1</i>                                           | <i>flp</i> operon protein Flp1                                                    |                                          | -3.22      | -3.72      |                                     |            |            |
|                                  | <i>flp2</i>                                           | <i>flp</i> operon protein Flp2                                                    |                                          | -3.39      | -3.81      |                                     |            |            |
|                                  | <i>flp3</i>                                           | <i>flp</i> operon protein Flp3                                                    |                                          | -3.08      | -8.91      |                                     |            | -2.33      |
|                                  | <i>glpT</i>                                           | Glycerol 3-phosphate transporter                                                  |                                          |            | -3.02      |                                     | -2.11      | -2.43      |
|                                  | <i>HD0196</i>                                         | Putative membrane protein                                                         |                                          |            |            |                                     | -2.71      | 2.74       |
|                                  | <i>HD0470</i>                                         | Probable component of the lipoprotein assembly complex with YaeT, YfgL, and NlpB) |                                          |            | 3.27       |                                     | 2.13       | 4.80       |
|                                  | <i>HD0587</i>                                         | LptA, protein essential for LPS transport across the periplasm                    |                                          |            | 3.21       |                                     |            |            |
|                                  | <i>HD0665</i>                                         | Hypothetical protein                                                              | -2.73                                    |            | 4.15       |                                     |            |            |
|                                  | <i>HD1071</i>                                         | Putative membrane protein                                                         |                                          | 3.92       | 4.59       |                                     |            |            |
| <i>HD1123</i>                    | Type IV pilin PilA                                    |                                                                                   |                                          |            |            |                                     | -4.76      |            |
| <i>hgbA</i>                      | Outer membrane receptor proteins, mostly Fe transport | -2.35                                                                             | -2.13                                    | -2.54      |            |                                     |            |            |

**Table S4: Functional Classification of Genes differentially expressed by deletion of either (p)ppGpp or DksA In Mid-Log, Transition, or Stationary Phase.**

| Functional Category <sup>a</sup>   | Gene          | Description or homolog                                         | 35000HPΔrelAΔspoT / 35000HP <sup>b</sup> |            |            | 35000HPΔdksA / 35000HP <sup>c</sup> |            |            |
|------------------------------------|---------------|----------------------------------------------------------------|------------------------------------------|------------|------------|-------------------------------------|------------|------------|
|                                    |               |                                                                | Fold-Change                              |            |            | Fold-Change                         |            |            |
|                                    |               |                                                                | Mid- Log                                 | Transition | Stationary | Mid- Log                            | Transition | Stationary |
|                                    | <i>kefB</i>   | putative Glutathione-regulated potassium-efflux system protein |                                          | 2.12       |            |                                     |            | 2.04       |
|                                    | <i>lolC</i>   | Lipoprotein releasing system transmembrane protein             |                                          |            | -2.19      |                                     |            |            |
|                                    | <i>momp</i>   | Major outer membrane protein                                   |                                          |            | 2.81       |                                     |            |            |
|                                    | <i>mrda</i>   | Penicillin-binding protein 2 (PBP-2)                           |                                          |            | -2.31      |                                     |            | -2.07      |
|                                    | <i>oapB</i>   | opacity associated protein B                                   | -2.92                                    |            |            |                                     |            |            |
|                                    | <i>ompA2</i>  | Outer membrane protein A precursor                             |                                          | -2.06      |            | -2.67                               |            |            |
|                                    | <i>ompP2A</i> | Outer membrane protein P2 homolog                              | -3.05                                    | -2.47      |            | -2.71                               |            |            |
|                                    | <i>ompP2B</i> | Outer membrane protein P2 homolog                              | 2.02                                     |            | 10.28      | 2.06                                |            | 3.93       |
|                                    | <i>ompP4</i>  | Outer membrane lipoprotein e (P4)                              |                                          |            |            |                                     |            | 2.32       |
|                                    | <i>pal</i>    | 18K peptidoglycan-associated outer membrane lipoprotein        |                                          |            |            |                                     | -2.15      |            |
|                                    | <i>rnfD</i>   | Putative Na-translocating NADH-quinone reductase               |                                          |            | -2.21      |                                     |            |            |
|                                    |               | Outer membrane lipoprotein SmpA, a component of the essential  | -2.34                                    |            | 9.96       |                                     |            | 5.06       |
|                                    | <i>smpA</i>   | YaeT outer-membrane protein assembly complex                   |                                          |            |            |                                     |            |            |
|                                    | <i>tadB</i>   | Flp pilus assembly protein                                     |                                          |            | -12.05     |                                     |            | -3.68      |
|                                    |               | Type II/IV secretion system protein TadC, associated with Flp  |                                          |            |            |                                     |            |            |
|                                    | <i>tadC</i>   | pilus assembly                                                 |                                          |            | -2.19      |                                     |            |            |
|                                    | <i>yidC</i>   | Inner membrane protein translocase component YidC, long form   |                                          |            |            |                                     |            | 2.22       |
| <b>Cellular Homeostasis</b>        |               |                                                                |                                          |            |            |                                     |            |            |
|                                    | <i>citD</i>   | Citrate lyase, gamma subunit                                   |                                          |            |            |                                     | 2.00       |            |
|                                    | <i>citE</i>   | Citrate lyase, beta chain                                      |                                          | 2.36       |            |                                     |            |            |
|                                    | <i>cydA</i>   | Cytochrome d ubiquinol oxidase subunit I                       |                                          |            |            |                                     | -2.32      |            |
|                                    | <i>cydB</i>   | Cytochrome d ubiquinol oxidase subunit II                      |                                          |            |            |                                     | -2.11      |            |
|                                    | <i>dsbA</i>   | Periplasmic thiol:disulfide interchange protein                |                                          |            | 4.97       |                                     |            | 2.93       |
|                                    | <i>dsbE1</i>  | Cytochrome c-type biogenesis protein                           |                                          |            | -2.12      |                                     |            | -2.27      |
|                                    | <i>ftpA</i>   | Fine tangled pili major subunit                                | -2.15                                    |            | 7.79       |                                     |            | 3.03       |
|                                    | <i>fisH</i>   | Cell division protein                                          |                                          | 4.41       |            |                                     |            |            |
|                                    | <i>HD0697</i> | thioredoxin-like protein                                       |                                          |            | 3.74       |                                     |            |            |
|                                    | <i>HD0700</i> | Peroxiredoxin family protein/glutaredoxin                      |                                          |            | 2.66       |                                     | -2.24      |            |
|                                    | <i>lpdA</i>   | Dihydroliipoamide dehydrogenase                                |                                          |            | -2.02      |                                     |            |            |
| <b>Cellular Response to Stress</b> |               |                                                                |                                          |            |            |                                     |            |            |
|                                    | <i>cpxR</i>   | Transcriptional regulatory protein CpxR                        |                                          |            | 7.19       |                                     |            | 5.89       |
|                                    | <i>HD0357</i> | Probable carbon starvation protein A                           |                                          |            | -2.23      |                                     | -2.02      |            |
|                                    | <i>hfq</i>    | RNA-binding protein                                            |                                          |            | 11.67      |                                     |            | 2.64       |
|                                    | <i>spoT</i>   | Guanosine-3',5'-bis(diphosphate) 3'-pyrophosphohydrolase       | NA                                       | NA         | NA         |                                     |            | 2.09       |
| <b>DNA Binding</b>                 |               |                                                                |                                          |            |            |                                     |            |            |
|                                    | <i>HD0292</i> | Hypothetical protein                                           |                                          |            | 5.41       |                                     |            | 4.00       |
|                                    | <i>HD0509</i> | Hypothetical protein                                           |                                          |            |            | 2.17                                | 4.63       | 2.18       |
|                                    | <i>HD1613</i> | Hypothetical protein                                           |                                          |            | 3.84       |                                     |            | 2.37       |
|                                    | <i>hupA</i>   | DNA-binding protein HU-alpha                                   |                                          |            | 3.04       |                                     | -2.18      | 2.19       |

Table S4: Functional Classification of Genes differentially expressed by deletion of either (p)ppGpp or DksA In Mid-Log, Transition, or Stationary Phase.

| Functional Category <sup>a</sup>               | Gene          | Description or homolog                                           | 35000HPΔrelAΔspoT / 35000HP <sup>b</sup> |            |            | 35000HPΔdksA/ 35000HP <sup>c</sup> |            |            |
|------------------------------------------------|---------------|------------------------------------------------------------------|------------------------------------------|------------|------------|------------------------------------|------------|------------|
|                                                |               |                                                                  | Fold-Change                              |            |            | Fold-Change                        |            |            |
|                                                |               |                                                                  | Mid- Log                                 | Transition | Stationary | Mid- Log                           | Transition | Stationary |
|                                                | <i>ner</i>    | possible DNA-binding protein                                     |                                          |            |            |                                    |            | -2.77      |
|                                                | <i>uspA</i>   | Universal stress protein A                                       |                                          |            | -4.57      |                                    |            | -3.20      |
| <b>DNA Metabolic Process</b>                   |               |                                                                  |                                          |            |            |                                    |            |            |
|                                                | <i>dnaA</i>   | Chromosomal replication initiator protein                        |                                          |            | 2.82       |                                    |            | 2.88       |
|                                                | <i>dnaJ</i>   | Chaperone protein                                                |                                          | 7.55       |            |                                    |            |            |
|                                                | <i>gam</i>    | putative host-nuclease inhibitor protein                         |                                          |            |            |                                    | 2.24       |            |
|                                                | <i>HD0095</i> | Mu phage DNA transposition protein B                             |                                          |            | -2.06      |                                    | 2.02       |            |
|                                                | <i>HD1444</i> | Hypothetical protein                                             |                                          |            |            |                                    | 2.80       | 2.61       |
|                                                | <i>HD1452</i> | Hypothetical protein                                             |                                          |            |            |                                    | 2.85       | 2.86       |
|                                                | <i>HD1686</i> | methylates LSU ribosomal protein L3p                             |                                          |            |            |                                    | -2.12      | 2.15       |
|                                                | <i>ihfA</i>   | Integration host factor alpha subunit                            |                                          |            | -2.13      |                                    |            | -2.26      |
|                                                | <i>ihfB</i>   | Integration host factor, beta subunit                            |                                          |            | -3.68      |                                    |            |            |
|                                                | <i>lexA</i>   | Probable LexA repressor                                          |                                          |            | 2.05       |                                    |            |            |
|                                                | <i>mutM</i>   | Formamidopyrimidine-DNA glycosylase                              |                                          | 2.15       |            | -2.09                              |            |            |
|                                                | <i>mutT</i>   | Mutator MutT protein                                             |                                          |            | 2.16       |                                    |            |            |
|                                                | <i>mutY</i>   | A/G-specific adenine glycosylase                                 |                                          |            |            |                                    | 2.23       | 2.33       |
|                                                | <i>nrdA</i>   | Ribonucleotide reductase of class Ia (aerobic), alpha subunit    |                                          |            | -3.17      |                                    |            |            |
|                                                | <i>parC</i>   | Topoisomerase IV subunit A                                       | 2.01                                     |            |            |                                    |            |            |
|                                                | <i>rdgC</i>   | DNA recombination-dependent growth factor C                      |                                          |            | 2.17       |                                    |            |            |
|                                                | <i>recN</i>   | DNA repair protein RecN                                          |                                          |            | 2.42       |                                    |            |            |
|                                                | <i>recR</i>   | Recombination protein RecR                                       |                                          |            | 2.99       |                                    |            | 2.07       |
|                                                | <i>rep</i>    | ATP-dependent DNA helicase Rep                                   |                                          |            | 2.46       |                                    |            | 2.17       |
|                                                | <i>ssb2</i>   | Single-stranded DNA-binding protein in PFGI-1-like cluster       | -2.09                                    |            |            |                                    |            |            |
|                                                | <i>topB1</i>  | DNA topoisomerase III in PFGI-1-like cluster                     |                                          |            |            |                                    |            | 6.19       |
|                                                | <i>uvrA</i>   | Excinuclease ABC subunit A                                       |                                          | 2.02       |            |                                    |            |            |
|                                                | <i>xseB</i>   | Exodeoxyribonuclease VII small subunit                           |                                          |            | 2.16       |                                    |            |            |
| <b>Fatty Acid Biosynthesis and Metabolism</b>  |               |                                                                  |                                          |            |            |                                    |            |            |
|                                                | <i>accA</i>   | Acetyl-coenzyme A carboxyl transferase alpha chain               |                                          |            | -2.97      |                                    |            | -2.83      |
|                                                | <i>acpP</i>   | Acyl carrier protein                                             |                                          |            | 3.08       |                                    |            | 3.12       |
|                                                | <i>fabA</i>   | 3-hydroxydecanoyl-[acyl-carrier-protein] dehydratase             |                                          | 2.53       | 2.61       |                                    |            |            |
|                                                | <i>fabB</i>   | 3-oxoacyl-[acyl-carrier-protein] synthase                        | 3.02                                     | 6.02       | 2.86       |                                    |            |            |
|                                                | <i>fabH</i>   | 3-oxoacyl-[acyl-carrier-protein] synthase                        |                                          |            | -2.47      |                                    |            |            |
|                                                | <i>fabI</i>   | Enoyl-[acyl-carrier-protein] reductase                           |                                          |            | 4.80       |                                    |            | 3.18       |
|                                                | <i>HD1711</i> | Acyl-CoA thioesterase YciA, involved in membrane biogenesis      |                                          |            | -3.59      |                                    |            | -2.38      |
|                                                | <i>ispB</i>   | Octaprenyl diphosphate synthase                                  |                                          |            | 2.27       |                                    |            | 2.56       |
|                                                | <i>lst</i>    | N-acetylneuraminic acid synthase-like protein                    |                                          |            | 2.83       |                                    |            |            |
|                                                | <i>waaF</i>   | ADP-heptose--lipooligosaccharide heptosyltransferase II          | -2.95                                    |            | 2.28       |                                    |            | 2.03       |
| <b>Intracellular Trafficking and Secretion</b> |               |                                                                  |                                          |            |            |                                    |            |            |
|                                                | <i>HD0974</i> | Chromosome partitioning ATPase in PFGI-1-like cluster, ParA-like | 2.61                                     |            |            |                                    |            |            |

**Table S4: Functional Classification of Genes differentially expressed by deletion of either (p)ppGpp or DksA In Mid-Log, Transition, or Stationary Phase.**

| Functional Category <sup>a</sup>   | Gene          | Description or homolog                                                             | 35000HPΔrelAΔspoT / 35000HP <sup>b</sup> |            |            | 35000HPΔdksA / 35000HP <sup>c</sup> |            |            |
|------------------------------------|---------------|------------------------------------------------------------------------------------|------------------------------------------|------------|------------|-------------------------------------|------------|------------|
|                                    |               |                                                                                    | Fold-Change                              |            |            | Fold-Change                         |            |            |
|                                    |               |                                                                                    | Mid- Log                                 | Transition | Stationary | Mid- Log                            | Transition | Stationary |
|                                    | <i>HD1305</i> | Type II/IV secretion system ATPase TadZ/CpaE, associated with Flp pilus assembly   |                                          |            | -3.47      |                                     |            |            |
|                                    | <i>HD1528</i> | Eha                                                                                |                                          |            |            | 2.25                                |            |            |
|                                    | <i>hhdA</i>   | Hemolysin                                                                          |                                          |            | -3.99      |                                     | -2.09      |            |
|                                    | <i>hhdB</i>   | Channel-forming transporter/cytolysins activator of TpsB family                    | -2.08                                    | -2.19      |            |                                     |            |            |
|                                    | <i>hofB</i>   | Type IV fimbrial assembly, ATPase PilB                                             |                                          |            |            |                                     | -2.25      |            |
|                                    | <i>lspA1</i>  | Large supernatant protein 1                                                        |                                          |            | -2.75      |                                     |            |            |
|                                    | <i>lspA2</i>  | Large supernatant protein 2                                                        | -2.22                                    |            | -5.07      |                                     |            |            |
|                                    | <i>lspB</i>   | Large supernatant protein exporter                                                 | -3.28                                    |            | -5.36      |                                     |            |            |
|                                    | <i>rcpA</i>   | Type II/IV secretion system secretin RcpA/CpaC, associated with Flp pilus assembly |                                          |            | -4.89      |                                     |            |            |
|                                    | <i>rcpB</i>   | Flp pilus assembly protein RcpB                                                    |                                          |            | -5.80      |                                     | -2.18      |            |
|                                    | <i>secG</i>   | Preprotein translocase subunit                                                     |                                          |            | 2.28       |                                     | 2.27       |            |
|                                    | <i>secY</i>   | Preprotein translocase SecY subunit                                                |                                          |            | -2.45      |                                     |            |            |
|                                    | <i>tadD</i>   | Flp pilus assembly protein TadD, contains TPR repeat                               |                                          |            | -2.31      |                                     |            |            |
|                                    | <i>tadF</i>   | Flp pilus assembly surface protein TadF, ATP/GTP-binding motif                     |                                          |            | -3.21      |                                     |            |            |
|                                    | <i>tata</i>   | Twin-arginine translocation protein                                                |                                          |            |            |                                     | -2.00      |            |
|                                    | <i>yajC</i>   | Preprotein translocase subunit                                                     |                                          |            | -3.25      |                                     | -2.34      |            |
| <b>Ion Transport</b>               |               |                                                                                    |                                          |            |            |                                     |            |            |
|                                    | <i>corA</i>   | Magnesium and cobalt transport protein CorA                                        | 4.29                                     | 2.90       |            |                                     |            |            |
|                                    | <i>HD0003</i> | ATP synthase protein I2                                                            |                                          |            | -3.77      |                                     | -2.03      |            |
|                                    | <i>HD0810</i> | Conserved hypothetical protein                                                     | 2.27                                     |            | 2.08       |                                     | 2.67       |            |
|                                    | <i>HD0866</i> | Anion permease ArsB/NhaD-like                                                      | 2.47                                     |            |            |                                     |            |            |
|                                    | <i>HD1227</i> | Putative Na <sup>+</sup> /H <sup>+</sup> antiporter                                |                                          |            | 3.48       |                                     |            |            |
|                                    | <i>HD1621</i> | Conserved hypothetical protein                                                     | 2.13                                     |            |            |                                     |            |            |
|                                    | <i>nqrA</i>   | Na <sup>+</sup> -translocating NADH-ubiquinone oxidoreductase, subunit A           |                                          |            | -10.26     |                                     |            |            |
|                                    | <i>nqrB</i>   | NADH dehydrogenase                                                                 |                                          |            | -8.72      |                                     | -2.32      |            |
|                                    | <i>nqrC</i>   | Na <sup>+</sup> -translocating NADH-ubiquinone oxidoreductase, subunit C           |                                          |            | -6.16      |                                     |            |            |
|                                    | <i>nqrD</i>   | Na <sup>+</sup> -translocating NADH-ubiquinone oxidoreductase, subunit D           |                                          | 2.00       | -5.39      |                                     | -2.22      |            |
|                                    | <i>nqrE</i>   | Na <sup>+</sup> -translocating NADH-ubiquinone oxidoreductase, subunit E           |                                          | 2.15       | -3.63      |                                     |            |            |
|                                    | <i>nqrF</i>   | Na <sup>+</sup> -translocating NADH-ubiquinone oxidoreductase, subunit F           |                                          | 2.85       | -2.03      |                                     |            |            |
|                                    | <i>oadB</i>   | Oxaloacetate decarboxylase beta chain                                              |                                          | 2.04       |            |                                     | -2.21      |            |
|                                    | <i>yfeB</i>   | Manganese ABC transporter, ATP-binding protein SitB                                |                                          |            | 4.97       |                                     |            |            |
|                                    | <i>znuA</i>   | Zinc ABC transporter, periplasmic-binding protein                                  |                                          |            |            |                                     | 2.89       |            |
| <b>Iron Sulfur Cluster Binding</b> |               |                                                                                    |                                          |            |            |                                     |            |            |
|                                    | <i>bioA</i>   | Adenosylmethionine-8-amino-7-oxononanoate aminotransferase                         |                                          |            | 2.05       |                                     |            |            |
|                                    | <i>bioB</i>   | Biotin synthetase                                                                  |                                          | 2.10       |            |                                     |            |            |
|                                    | <i>bioD</i>   | Dethiobiotin synthetase                                                            |                                          | -2.04      |            |                                     |            |            |
|                                    | <i>chuW</i>   | Putative heme iron utilization protein                                             |                                          |            | -3.14      |                                     | -2.01      |            |
|                                    | <i>fdx2</i>   | Ferredoxin, 2Fe-2S                                                                 |                                          |            | -2.37      |                                     |            |            |

**Table S4: Functional Classification of Genes differentially expressed by deletion of either (p)ppGpp or DksA In Mid-Log, Transition, or Stationary Phase.**

| Functional Category <sup>a</sup>         | Gene          | Description or homolog                                             | 35000HPΔrelAΔspoT / 35000HP <sup>b</sup> |            |            | 35000HPΔdksA / 35000HP <sup>c</sup> |            |            |
|------------------------------------------|---------------|--------------------------------------------------------------------|------------------------------------------|------------|------------|-------------------------------------|------------|------------|
|                                          |               |                                                                    | Fold-Change                              |            |            | Fold-Change                         |            |            |
|                                          |               |                                                                    | Mid- Log                                 | Transition | Stationary | Mid- Log                            | Transition | Stationary |
|                                          | <i>HD0319</i> | Ribosomal RNA large subunit methyltransferase N                    |                                          |            | -2.85      | 2.40                                | 2.63       |            |
|                                          | <i>HD0684</i> | Probable iron binding protein from the HesB_IscA_SufA family       |                                          |            | 2.38       |                                     |            |            |
|                                          | <i>HD1084</i> | HesB family protein                                                |                                          |            | -5.34      |                                     |            | -3.16      |
|                                          | <i>iscU</i>   | Iron-sulfur cluster assembly scaffold protein                      |                                          | 2.51       | -2.67      |                                     |            | -2.05      |
|                                          | <i>ykgF</i>   | Putative iron-sulfur electron transport protein                    |                                          |            | -2.39      |                                     |            |            |
| <b>Lipid Biosynthesis and Metabolism</b> |               |                                                                    |                                          |            |            |                                     |            |            |
|                                          | <i>glpB</i>   | Anaerobic glycerol-3-phosphate dehydrogenase subunit B             |                                          |            | -3.95      |                                     |            | -2.58      |
|                                          | <i>hlp</i>    | putative lipoprotein                                               |                                          |            | 2.17       |                                     |            | 2.48       |
|                                          | <i>hlpB</i>   | lipoprotein                                                        |                                          |            | 3.35       |                                     |            | 3.12       |
|                                          | <i>lgtB</i>   | diadenosine tetrphosphatase                                        |                                          |            |            |                                     |            | 3.13       |
|                                          | <i>lipB</i>   | Lipoate-protein ligase B                                           |                                          |            | -2.40      |                                     |            |            |
|                                          | <i>lpxB</i>   | Lipid-A-disaccharide synthase                                      |                                          |            |            | 2.13                                | 2.83       |            |
|                                          | <i>lpxD</i>   | UDP-3-O-[3-hydroxymyristoyl] glucosamine N-acyltransferase         |                                          |            |            |                                     |            | 2.16       |
|                                          | <i>menB</i>   | Naphthoate synthase                                                |                                          |            | -2.05      |                                     |            |            |
|                                          | <i>pgpA</i>   | Phosphatidylglycerophosphatase A                                   | -2.06                                    |            |            |                                     |            |            |
|                                          | <i>pgsA</i>   | CDP-diacylglycerol--glycerol-3-phosphate 3-phosphatidyltransferase |                                          |            | 2.49       |                                     |            | 2.16       |
|                                          | <i>plsC</i>   | 1-acyl-sn-glycerol-3-phosphate acyltransferase                     |                                          |            | -3.94      |                                     |            | -2.73      |
| <b>Metal Ion Binding</b>                 |               |                                                                    |                                          |            |            |                                     |            |            |
|                                          | <i>cysQ</i>   | 3'(2'),5'-bisphosphate nucleotidase                                |                                          |            | 3.17       |                                     |            | 2.79       |
|                                          | <i>finA</i>   | Ferritin-like protein 2                                            |                                          | -2.08      | 2.42       |                                     | -2.26      | 4.17       |
|                                          | <i>finB</i>   | Ferritin-like protein 2                                            |                                          | -2.05      | 3.17       |                                     | -2.38      | 5.26       |
|                                          | <i>glmM</i>   | Phosphoglucosamine mutase                                          |                                          |            |            |                                     | 2.78       | 2.56       |
|                                          | <i>gpt</i>    | Xanthine-guanine phosphoribosyltransferase)                        |                                          |            | 2.58       |                                     |            | 3.33       |
|                                          | <i>HD0117</i> | hypothetical protein                                               |                                          |            |            |                                     | 3.91       |            |
|                                          | <i>HD0457</i> | Soluble cytochrome b562                                            |                                          |            | 5.44       |                                     |            | 5.49       |
|                                          | <i>HD1365</i> | Carbonic anhydrase                                                 |                                          |            | 2.33       |                                     |            |            |
|                                          | <i>HD1915</i> | Membrane protein YedZ                                              |                                          |            | 2.56       |                                     |            |            |
|                                          | <i>msrB</i>   |                                                                    |                                          |            |            |                                     |            |            |
|                                          | <i>napA</i>   | Periplasmic nitrate reductase precursor                            |                                          |            | -2.19      |                                     | -2.09      | -2.07      |
|                                          | <i>napB</i>   | Nitrate reductase cytochrome c550-type subunit                     |                                          |            | -7.27      | -2.05                               | -2.26      | -5.53      |
|                                          | <i>napC</i>   | Cytochrome c-type protein                                          |                                          |            | -3.32      |                                     | -2.24      | -2.71      |
|                                          | <i>napD</i>   | Possible protein                                                   |                                          |            | -2.48      |                                     | -2.02      |            |
|                                          | <i>napF</i>   | Ferredoxin-type protein                                            |                                          |            | -3.04      |                                     |            |            |
|                                          | <i>napG</i>   | Ferredoxin-type protein NapG (periplasmic nitrate reductase)       |                                          |            | -2.12      |                                     |            |            |
|                                          | <i>napH</i>   | Polyferredoxin NapH (periplasmic nitrate reductase)                |                                          |            | -8.44      | -2.16                               |            | -4.01      |
|                                          | <i>nrfA</i>   | Cytochrome c552 precursor                                          |                                          |            |            | -2.22                               | -2.00      | -5.89      |
|                                          | <i>nrfB</i>   | Cytochrome c-type protein NrfB precursor                           |                                          |            |            |                                     | -2.27      |            |
|                                          | <i>ppa</i>    | Inorganic pyrophosphatase                                          |                                          |            | 5.08       |                                     | -2.43      |            |
|                                          | <i>rimO</i>   | Ribosomal protein methylthiotransferase                            |                                          |            | -2.50      |                                     |            | 3.76       |

**Table S4: Functional Classification of Genes differentially expressed by deletion of either (p)ppGpp or DksA In Mid-Log, Transition, or Stationary Phase.**

| Functional Category <sup>a</sup> | Gene                                                                       | Description or homolog                                                | 35000HPΔrelAΔspoT / 35000HP <sup>b</sup> |            |            | 35000HPΔdksA / 35000HP <sup>c</sup> |            |            |
|----------------------------------|----------------------------------------------------------------------------|-----------------------------------------------------------------------|------------------------------------------|------------|------------|-------------------------------------|------------|------------|
|                                  |                                                                            |                                                                       | Fold-Change                              |            |            | Fold-Change                         |            |            |
|                                  |                                                                            |                                                                       | Mid- Log                                 | Transition | Stationary | Mid- Log                            | Transition | Stationary |
| Nucleotide Binding               | <i>sodA</i>                                                                | Manganese superoxide dismutase                                        |                                          |            | 2.02       |                                     |            |            |
|                                  | <i>sodC</i>                                                                | Superoxide dismutase [Cu-Zn] precursor                                |                                          | -2.06      | 2.40       |                                     | -2.21      |            |
|                                  | <i>torZ</i>                                                                | Trimethylamine-N-oxide reductase                                      |                                          |            | -2.50      |                                     |            |            |
|                                  | <i>atpA</i>                                                                | ATP synthase alpha chain                                              |                                          |            | -2.74      |                                     |            |            |
|                                  | <i>atpC</i>                                                                | ATP synthase epsilon chain                                            |                                          |            | -7.96      |                                     | -3.16      |            |
|                                  | <i>atpD</i>                                                                | ATP synthase beta chain                                               |                                          |            | -6.57      |                                     | -2.09      |            |
|                                  | <i>atpE</i>                                                                | ATP synthase C chain                                                  |                                          |            | -9.69      |                                     | -2.83      |            |
|                                  | <i>atpF</i>                                                                | ATP synthase B chain                                                  |                                          |            | -8.29      |                                     | -2.65      |            |
|                                  | <i>atpG</i>                                                                | ATP synthase gamma chain                                              |                                          |            | -4.20      |                                     |            |            |
|                                  | <i>atpH</i>                                                                | ATP synthase delta chain                                              |                                          |            | -4.63      |                                     |            |            |
|                                  | <i>coaD</i>                                                                | Phosphopantetheine adenylyltransferase                                |                                          |            | -2.40      |                                     | -2.38      |            |
|                                  | <i>deaD</i>                                                                | Cold-shock DEAD box protein-A                                         | 2.36                                     |            |            |                                     |            |            |
|                                  | <i>era</i>                                                                 | GTP-binding protein era homolog                                       |                                          |            | -2.89      |                                     |            |            |
|                                  | <i>frdA</i>                                                                | Fumarate reductase flavoprotein subunit                               |                                          |            | -6.76      |                                     | -3.75      |            |
|                                  | <i>frdB</i>                                                                | Fumarate reductase iron-sulfur subunit                                |                                          |            | -6.61      |                                     | -3.81      |            |
|                                  | <i>guaA</i>                                                                | GMP synthase [glutamine-hydrolyzing]                                  | -2.40                                    |            | 2.13       |                                     |            |            |
|                                  | <i>guaB</i>                                                                | Inosine-5-monophosphate dehydrogenase                                 | -2.52                                    | -2.16      | 3.02       |                                     |            |            |
|                                  | <i>HD0584</i>                                                              | Hypothetical protein                                                  | -2.00                                    |            | 3.01       |                                     | 2.03       |            |
|                                  | <i>HD0586</i>                                                              | Lipopolysaccharide ABC transporter, ATP-binding protein LptB          |                                          |            | 2.89       |                                     |            |            |
|                                  | <i>HD0905</i>                                                              | Mobile element protein                                                | -2.60                                    |            | -5.45      |                                     | -3.04      |            |
|                                  | <i>hflX</i>                                                                | GTP-binding protein                                                   |                                          |            | 11.32      |                                     | 2.98       |            |
|                                  | <i>lldD</i>                                                                | L-lactate dehydrogenase                                               |                                          |            | -2.95      |                                     |            |            |
|                                  | <i>lolD</i>                                                                | Lipoprotein releasing system ATP-binding protein                      |                                          |            | -3.10      |                                     | -2.33      |            |
| <i>ndk</i>                       | Nucleoside diphosphate kinase                                              |                                                                       |                                          | 2.45       |            |                                     |            |            |
| <i>obgE</i>                      | GTP-binding protein                                                        |                                                                       |                                          | -2.22      |            |                                     |            |            |
| <i>rnfG</i>                      | Electron transport complex protein RnfG                                    |                                                                       |                                          | -2.72      |            |                                     |            |            |
| <i>sapF</i>                      | Peptide transport system ATP-binding protein SapF                          |                                                                       |                                          | 3.77       |            | 3.47                                |            |            |
| <i>selD</i>                      | Selenide, water dikinase                                                   |                                                                       |                                          |            |            | -2.21                               |            |            |
| <i>surE</i>                      | 5-nucleotidase / Exopolyphosphatase                                        |                                                                       |                                          | -2.08      |            | 2.28                                |            |            |
| <i>tadA</i>                      | Type II/IV secretion system ATP hydrolase TadA/VirB11/CpaF, TadA subfamily |                                                                       |                                          | -6.86      |            | -2.37                               |            |            |
| <i>tmk</i>                       | Thymidylate kinase                                                         |                                                                       |                                          | 2.05       |            |                                     |            |            |
| <i>typA</i>                      | GTP-binding protein TypA/BipA                                              |                                                                       |                                          |            |            | 2.41                                |            |            |
| <i>uup</i>                       | ABC-type transport protein Uup                                             |                                                                       |                                          | -3.04      |            |                                     |            |            |
| <i>visC</i>                      | 2-octaprenyl-3-methyl-6-methoxy-1,4-benzoquinol hydroxylase                | -2.26                                                                 |                                          |            |            |                                     |            |            |
| Protein Fate                     | <i>ccmA</i>                                                                | ABC transporter involved in cytochrome c biogenesis, ATPase component |                                          |            | -3.08      |                                     | -2.25      |            |
|                                  | <i>clpB</i>                                                                | Chaperone protein                                                     | -2.41                                    | 8.36       |            |                                     |            |            |
|                                  | <i>degP</i>                                                                | Outer membrane stress sensor protease DegQ                            |                                          |            | 2.50       |                                     |            |            |

**Table S4: Functional Classification of Genes differentially expressed by deletion of either (p)ppGpp or DksA In Mid-Log, Transition, or Stationary Phase.**

| Functional Category <sup>a</sup> | Gene          | Description or homolog                                        | 35000HPΔrelAAspoT / 35000HP <sup>b</sup> |            |            | 35000HPΔdksA / 35000HP <sup>c</sup> |            |            |
|----------------------------------|---------------|---------------------------------------------------------------|------------------------------------------|------------|------------|-------------------------------------|------------|------------|
|                                  |               |                                                               | Fold-Change                              |            |            | Fold-Change                         |            |            |
|                                  |               |                                                               | Mid- Log                                 | Transition | Stationary | Mid- Log                            | Transition | Stationary |
|                                  | <i>dnaK</i>   | Chaperone protein                                             | -2.09                                    | 7.70       |            |                                     | 2.00       |            |
|                                  | <i>fkpA</i>   | FKBP-type peptidyl-prolyl cis-trans isomerase                 |                                          |            | 2.71       |                                     |            |            |
|                                  | <i>gcp</i>    |                                                               |                                          |            |            |                                     |            |            |
|                                  | <i>groEL</i>  | 60 kDa chaperonin                                             | -3.99                                    | 4.78       | 2.05       |                                     |            |            |
|                                  | <i>groES</i>  | 10 kDa chaperonin                                             | -3.47                                    | 5.10       |            |                                     |            |            |
|                                  | <i>grpE</i>   | Heat shock protein                                            | -2.00                                    | 7.32       |            |                                     |            |            |
|                                  | <i>HD1278</i> | Possible serine protease                                      |                                          |            | -2.02      |                                     | -2.39      |            |
|                                  | <i>HD1280</i> | Possible serine protease homolog                              |                                          |            | -2.72      |                                     | -2.21      |            |
|                                  | <i>HD1339</i> | Cell wall endopeptidase, family M23/M37                       |                                          |            |            |                                     | 2.07       |            |
|                                  | <i>HD1436</i> | Hypothetical protein                                          |                                          |            |            |                                     | 2.11       |            |
|                                  | <i>HD1513</i> | Putative RND efflux membrane fusion protein                   |                                          | 2.81       |            |                                     |            |            |
|                                  | <i>HD1895</i> | putative accessory processing protein                         |                                          |            | -3.53      |                                     | -2.16      |            |
|                                  | <i>hemK</i>   | Protein-N(5)-glutamine methyltransferase PrmC                 |                                          |            | -2.07      |                                     | -2.08      |            |
|                                  | <i>hscA</i>   | Chaperone protein                                             |                                          | 2.22       | -2.69      |                                     |            |            |
|                                  | <i>hscB</i>   | Chaperone protein                                             |                                          | 2.06       |            |                                     |            |            |
|                                  | <i>hslU</i>   | ATP-dependent hsl protease ATP-binding subunit                |                                          | 15.78      |            |                                     |            |            |
|                                  | <i>hslV</i>   | ATP-dependent protease \                                      |                                          | 13.12      |            |                                     |            |            |
|                                  | <i>htpX</i>   | putative protease                                             |                                          | 14.26      |            |                                     |            |            |
|                                  | <i>icc</i>    | 3',5'-cyclic-nucleotide phosphodiesterase                     |                                          |            | -2.78      |                                     | -2.57      |            |
|                                  | <i>iscS</i>   | Cysteine desulfurase                                          |                                          | 2.12       |            |                                     |            |            |
|                                  | <i>lepB</i>   | Signal peptidase I                                            |                                          |            | -2.67      |                                     |            |            |
|                                  | <i>lon</i>    | ATP-dependent protease La, Type I                             |                                          | 3.30       |            |                                     |            |            |
|                                  | <i>map</i>    | Methionine aminopeptidase                                     |                                          |            |            |                                     | 2.73       |            |
|                                  | <i>pepB</i>   | Peptidase B                                                   | -2.51                                    |            |            |                                     |            |            |
|                                  | <i>pepD</i>   | Peptidase D                                                   |                                          |            | 2.41       |                                     | 2.23       |            |
|                                  | <i>ppiD</i>   | Peptidyl-prolyl cis-trans isomerase                           |                                          |            | 2.42       |                                     |            |            |
|                                  | <i>prlC</i>   | Oligopeptidase A                                              | -2.29                                    | 6.38       |            |                                     |            |            |
|                                  | <i>prmA</i>   | Ribosomal protein L11 methyltransferase                       |                                          |            | -2.02      |                                     |            |            |
|                                  | <i>proQ</i>   | ProQ: influences osmotic activation of compatible solute ProP |                                          |            | 5.81       |                                     | 2.49       |            |
|                                  | <i>slyD</i>   | FKBP-type peptidyl-prolyl cis-trans isomerase SlyD            |                                          | -2.12      |            | 2.01                                | 2.05       |            |
|                                  | <i>SohB</i>   | Possible secreted protease sohB                               |                                          |            |            |                                     |            |            |
|                                  | <i>surA</i>   | Survival protein SurA homolog                                 |                                          |            | 4.13       |                                     | 2.21       |            |
| <b>RNA Binding</b>               |               |                                                               |                                          |            |            |                                     |            |            |
|                                  | <i>HD0356</i> | Putative deoxyribonuclease YjjV                               |                                          |            | 2.06       |                                     |            |            |
|                                  | <i>HD1200</i> | RNA binding protein                                           |                                          |            | 3.97       |                                     | 2.98       |            |
|                                  | <i>rsuA</i>   | Ribosomal small subunit pseudouridine synthase A              |                                          |            | 3.31       |                                     |            |            |
|                                  | <i>vacB</i>   | 3'-to-5' exoribonuclease RNase R                              |                                          |            | 2.04       |                                     |            |            |
| <b>RNA Processing</b>            |               |                                                               |                                          |            |            |                                     |            |            |
|                                  | <i>HD0270</i> | Putative tRNA/tRNA methyltransferase                          |                                          |            | -2.10      |                                     |            |            |
|                                  | <i>HD0448</i> | tRNA dihydrouridine synthase B                                | 2.23                                     |            | -4.61      |                                     |            |            |

**Table S4: Functional Classification of Genes differentially expressed by deletion of either (p)ppGpp or DksA In Mid-Log, Transition, or Stationary Phase.**

| Functional Category <sup>a</sup> | Gene          | Description or homolog                                                             | 35000HPΔrelAA <sub>SpoT</sub> / 35000HP <sup>b</sup> |            |            | 35000HPΔdksA / 35000HP <sup>c</sup> |            |            |
|----------------------------------|---------------|------------------------------------------------------------------------------------|------------------------------------------------------|------------|------------|-------------------------------------|------------|------------|
|                                  |               |                                                                                    | Fold-Change                                          |            |            | Fold-Change                         |            |            |
|                                  |               |                                                                                    | Mid- Log                                             | Transition | Stationary | Mid- Log                            | Transition | Stationary |
|                                  | <i>HD0478</i> | 23S rRNA (Uracil-5-) -methyltransferase rumB                                       |                                                      |            | 2.75       |                                     |            | 2.52       |
|                                  | <i>HD1138</i> | tRNA pseudouridine synthase C                                                      |                                                      |            | 2.10       |                                     |            | 2.08       |
|                                  | <i>HD1664</i> | tRNA:Cm32/Um32 methyltransferase                                                   | -2.55                                                |            | -2.68      |                                     |            |            |
|                                  | <i>ksgA</i>   | Dimethyladenosine transferase                                                      |                                                      |            | 2.03       |                                     |            |            |
|                                  | <i>miaA</i>   | tRNA dimethylallyltransferase                                                      |                                                      |            | 7.64       |                                     |            |            |
|                                  | <i>mmmC</i>   | tRNA (5-methylaminomethyl-2-thiouridylate)-methyltransferase                       | -2.51                                                | -2.77      |            |                                     |            |            |
|                                  | <i>pcnB</i>   | Poly A polymerase                                                                  |                                                      |            |            |                                     |            | 2.14       |
|                                  | <i>rbfA</i>   | Ribosome binding factor A                                                          | 2.19                                                 | 2.41       | -8.10      |                                     |            | -4.14      |
|                                  | <i>rimM</i>   | 16S rRNA processing protein RimM                                                   |                                                      |            | -2.80      |                                     |            |            |
|                                  | <i>rnc</i>    | Ribonuclease III                                                                   |                                                      |            | -2.86      |                                     |            |            |
|                                  | <i>rnpA</i>   | Ribonuclease P protein component                                                   |                                                      |            | 3.80       |                                     |            | 3.54       |
|                                  | <i>rrmJ</i>   | Cell division protein FtsJ / Ribosomal RNA large subunit methyltransferase E       |                                                      | 2.32       |            |                                     |            |            |
|                                  | <i>rumA</i>   | 23S rRNA (Uracil-5-) -methyltransferase RumA                                       | 2.21                                                 |            |            |                                     |            |            |
|                                  | <i>sun</i>    | 16S rRNA (cytosine(967)-C(5))-methyltransferase                                    |                                                      |            | -4.35      |                                     |            | -3.63      |
|                                  | <i>trmB</i>   | tRNA (guanine46-N7-) -methyltransferase                                            |                                                      |            | -2.91      |                                     |            | -2.44      |
|                                  | <i>trmD</i>   | tRNA (Guanine37-N1) -methyltransferase                                             | 2.02                                                 |            |            |                                     | -2.06      |            |
|                                  | <i>truA</i>   | tRNA pseudouridine synthase A                                                      |                                                      |            |            |                                     |            | 2.00       |
|                                  | <i>truB</i>   | tRNA pseudouridine synthase B                                                      |                                                      | 2.00       |            |                                     |            |            |
| <b>Transcription</b>             |               |                                                                                    |                                                      |            |            |                                     |            |            |
|                                  | <i>argR</i>   | Arginine pathway regulatory protein, repressor of arg regulon                      |                                                      |            | 2.38       |                                     |            |            |
|                                  | <i>crp</i>    | Cyclic AMP receptor protein                                                        |                                                      |            | 2.78       |                                     |            |            |
|                                  | <i>cspC</i>   | Cold shock protein CspA                                                            | 2.23                                                 |            | 9.40       |                                     | -2.84      | 7.48       |
|                                  | <i>cspD</i>   | Cold shock protein CspD                                                            |                                                      |            | -4.06      |                                     |            | -2.63      |
|                                  | <i>fis</i>    | DNA-binding protein                                                                |                                                      |            | -4.63      |                                     |            |            |
|                                  | <i>greA</i>   | Transcription elongation factor                                                    |                                                      |            | 2.33       |                                     |            |            |
|                                  | <i>greB</i>   | Transcription elongation factor                                                    |                                                      |            | -2.31      |                                     |            | -2.21      |
|                                  | <i>HD0089</i> | Transcriptional regulatory protein                                                 |                                                      |            | -3.15      |                                     |            |            |
|                                  | <i>HD0698</i> | Unsaturated fatty acid biosynthesis repressor FabR, TetR family                    |                                                      |            | 3.15       |                                     |            |            |
|                                  | <i>HD1533</i> | Transcriptional regulator, IclR family                                             |                                                      | 2.07       |            | 2.15                                | 3.34       |            |
|                                  | <i>HD2030</i> | Hypothetical protein                                                               | -2.36                                                |            |            |                                     |            |            |
|                                  | <i>hlyX</i>   | Catabolite gene activator and regulatory subunit of cAMP-dependent protein kinases |                                                      |            | 2.14       |                                     |            | 2.35       |
|                                  | <i>lrp</i>    | Leucine-responsive regulatory protein                                              |                                                      |            | -2.04      |                                     |            |            |
|                                  | <i>purR</i>   | Purine nucleotide synthesis repressor                                              |                                                      |            | 2.08       |                                     |            |            |
|                                  | <i>rpoB</i>   | DNA-directed RNA polymerase beta subunit                                           |                                                      | 2.25       | -2.48      |                                     |            |            |
|                                  | <i>rpoC</i>   | DNA-directed RNA polymerase beta' subunit                                          |                                                      | 2.92       | -4.07      |                                     |            |            |
|                                  | <i>rpoE</i>   | RNA polymerase sigma-E factor                                                      |                                                      |            | 3.59       |                                     |            |            |
|                                  | <i>rpoZ</i>   | RNA polymerase omega subunit                                                       |                                                      |            | 2.88       |                                     |            |            |
|                                  | <i>rseA</i>   | Sigma factor RpoE negative regulatory protein                                      |                                                      |            | 2.02       |                                     |            |            |
|                                  | <i>rseC</i>   | Sigma factor RpoE regulatory protein                                               |                                                      |            | -2.09      |                                     |            |            |



**Table S4: Functional Classification of Genes differentially expressed by deletion of either (p)ppGpp or DksA In Mid-Log, Transition, or Stationary Phase.**

| Functional Category <sup>a</sup> | Gene          | Description or homolog                                           | 35000HPΔrelAAspoT / 35000HP <sup>b</sup> |            |            | 35000HPΔdksA/ 35000HP <sup>c</sup> |            |            |
|----------------------------------|---------------|------------------------------------------------------------------|------------------------------------------|------------|------------|------------------------------------|------------|------------|
|                                  |               |                                                                  | Fold-Change                              |            |            | Fold-Change                        |            |            |
|                                  |               |                                                                  | Mid- Log                                 | Transition | Stationary | Mid- Log                           | Transition | Stationary |
|                                  | <i>tldD</i>   | TldD protein, part of TldE/TldD proteolytic complex              |                                          |            | -2.21      |                                    |            | -2.07      |
| <b>Translation</b>               |               |                                                                  |                                          |            |            |                                    |            |            |
|                                  | <i>asnA</i>   | Aspartate--ammonia ligase                                        |                                          |            | 4.83       |                                    |            |            |
|                                  | <i>def</i>    | Peptide deformylase                                              |                                          |            | 3.40       |                                    | -2.08      | 2.21       |
|                                  | <i>efp</i>    | Translation elongation factor P                                  | 2.01                                     |            |            |                                    |            | 4.27       |
|                                  | <i>fusA</i>   | Translation elongation factor G                                  |                                          |            | -2.85      |                                    |            |            |
|                                  | <i>HD1357</i> | Conserved possible translation initiation factor                 | -2.38                                    |            |            |                                    |            |            |
|                                  | <i>hisS</i>   | Histidyl-tRNA synthetase                                         |                                          |            | -3.50      |                                    |            |            |
|                                  | <i>infB</i>   | Translation initiation factor IF-2                               | 2.03                                     |            | -2.78      |                                    |            | -2.22      |
|                                  | <i>prfB</i>   | Peptide chain release factor 2; programmed frameshift-containing |                                          |            | 2.42       |                                    |            |            |
|                                  | <i>prfC</i>   | Peptide chain release factor 3                                   |                                          |            | -2.40      |                                    |            |            |
|                                  | <i>pth</i>    | Peptidyl-tRNA hydrolase                                          |                                          |            | 2.32       |                                    |            | 3.18       |
|                                  | <i>rpIA</i>   | LSU ribosomal protein L1p (L10Ae)                                | 2.31                                     |            |            |                                    |            | 2.46       |
|                                  | <i>rpIB</i>   | LSU ribosomal protein L2p (L8e)                                  |                                          |            | -2.36      |                                    |            |            |
|                                  | <i>rpIC</i>   | LSU ribosomal protein L3p (L3e)                                  | 2.40                                     |            | -2.44      |                                    |            |            |
|                                  | <i>rpID</i>   | LSU ribosomal protein L4p (L1e)                                  | 2.30                                     |            | -3.03      |                                    |            |            |
|                                  | <i>rpIE</i>   | LSU ribosomal protein L5p (L11e)                                 | 2.17                                     |            |            |                                    |            |            |
|                                  | <i>rpIF</i>   | LSU ribosomal protein L6p (L9e)                                  |                                          |            | -2.24      |                                    |            |            |
|                                  | <i>rpII</i>   | LSU ribosomal protein L9p                                        | 2.39                                     |            | 3.11       |                                    |            |            |
|                                  | <i>rpIJ</i>   | LSU ribosomal protein L10p (P0)                                  | 4.69                                     |            |            |                                    |            |            |
|                                  | <i>rpIK</i>   | LSU ribosomal protein L11p (L12e)                                | 2.27                                     |            | -2.01      |                                    |            |            |
|                                  | <i>rpIL</i>   | LSU ribosomal protein L7/L12 (P1/P2)                             | 5.31                                     |            | 2.19       |                                    |            | 3.25       |
|                                  | <i>rpIN</i>   | LSU ribosomal protein L14p (L23e)                                | 2.10                                     |            |            |                                    |            |            |
|                                  | <i>rpIO</i>   | LSU ribosomal protein L15p (L27Ae)                               |                                          |            | -4.03      |                                    |            | -2.06      |
|                                  | <i>rpIP</i>   | LSU ribosomal protein L16p (L10e)                                |                                          |            | -2.06      |                                    |            |            |
|                                  | <i>rpIX</i>   | LSU ribosomal protein L19p                                       | 2.41                                     |            |            |                                    |            |            |
|                                  | <i>rpIY</i>   | LSU ribosomal protein L20p                                       |                                          |            | -2.75      |                                    |            | 2.19       |
|                                  | <i>rpIS</i>   | LSU ribosomal protein L22p (L17e)                                | 2.03                                     |            | -3.43      |                                    |            |            |
|                                  | <i>rpIT</i>   | LSU ribosomal protein L23p (L23Ae)                               | 2.16                                     |            | -3.49      |                                    |            |            |
|                                  | <i>rpIV</i>   | LSU ribosomal protein L24p (L26e)                                | 2.23                                     |            |            |                                    |            | -2.13      |
|                                  | <i>rpIW</i>   | LSU ribosomal protein L25p                                       | 3.71                                     |            | 3.25       |                                    |            |            |
|                                  | <i>rpmB</i>   | LSU ribosomal protein L28p                                       |                                          |            | 2.35       |                                    |            | 2.58       |
|                                  | <i>rpmC</i>   | LSU ribosomal protein L29p (L35e)                                |                                          |            | -2.04      |                                    |            |            |
|                                  | <i>rpmD</i>   | LSU ribosomal protein L30p (L7e)                                 |                                          |            | -4.01      |                                    |            | -2.00      |
|                                  | <i>rpmE</i>   | LSU ribosomal protein L31p, zinc-dependent                       |                                          | -2.14      | 2.05       |                                    |            | 2.17       |
|                                  | <i>rpmE2</i>  | 50S ribosomal protein L31                                        |                                          | 2.31       |            | 2.90                               |            |            |
|                                  | <i>rpmG</i>   | LSU ribosomal protein L33p, zinc-independent                     |                                          |            | 3.00       |                                    |            | 3.00       |
|                                  | <i>rpmH</i>   | LSU ribosomal protein L34p                                       |                                          |            | 2.68       |                                    |            | 2.35       |
|                                  | <i>rpmI</i>   | LSU ribosomal protein L35p                                       |                                          |            | -2.73      |                                    |            |            |
|                                  | <i>rpmJ</i>   | LSU ribosomal protein L36p                                       |                                          | 2.27       | -3.14      | 2.81                               |            |            |
|                                  | <i>rpsB</i>   | SSU ribosomal protein S2p (SAe)                                  |                                          |            | 2.19       |                                    |            |            |



**Table S4: Functional Classification of Genes differentially expressed by deletion of either (p)ppGpp or DksA In Mid-Log, Transition, or Stationary Phase.**

| Functional Category <sup>a</sup> | Gene          | Description or homolog                                                      | 35000HPΔ <i>relA</i> Δ <i>spoT</i> / 35000HP <sup>b</sup> |            |            | 35000HPΔ <i>dksA</i> / 35000HP <sup>c</sup> |            |            |
|----------------------------------|---------------|-----------------------------------------------------------------------------|-----------------------------------------------------------|------------|------------|---------------------------------------------|------------|------------|
|                                  |               |                                                                             | Fold-Change                                               |            |            | Fold-Change                                 |            |            |
|                                  |               |                                                                             | Mid- Log                                                  | Transition | Stationary | Mid- Log                                    | Transition | Stationary |
|                                  | <i>HD0136</i> | hypothetical protein                                                        |                                                           |            |            | 3.77                                        | 4.99       |            |
|                                  | <i>HD0150</i> | Phage FAD/FMN-containing dehydrogenase                                      |                                                           |            | -2.66      |                                             | 2.84       |            |
|                                  | <i>HD0250</i> | Putative preQ0 transporter                                                  |                                                           |            |            | 2.11                                        |            | 3.69       |
|                                  | <i>HD0326</i> | Hypothetical protein co-occurring with RecR                                 |                                                           |            |            |                                             |            |            |
|                                  | <i>HD0412</i> | Tex                                                                         |                                                           |            |            |                                             |            |            |
|                                  | <i>HD0534</i> | Phage FAD/FMN-containing dehydrogenase                                      |                                                           | 2.55       | -2.37      |                                             | 3.67       |            |
|                                  | <i>HD0588</i> | Uncharacterized protein YrbK clustered with lipopolysaccharide transporters |                                                           |            |            |                                             |            |            |
|                                  | <i>HD0778</i> | UPF0235 protein VC0458                                                      | -2.73                                                     | -2.42      | -2.21      |                                             |            |            |
|                                  | <i>HD1218</i> | Periplasmic lysozyme inhibitor of c-type lysozyme                           | -2.53                                                     |            | 5.62       |                                             |            |            |
|                                  | <i>HD1377</i> | Protein YeeX                                                                | -2.26                                                     | -2.46      |            |                                             |            |            |
|                                  | <i>HD1379</i> | Hypothetical protein                                                        |                                                           |            | -2.87      |                                             |            |            |
|                                  | <i>HD1386</i> | Predicted P-loop ATPase fused to an acetyltransferase                       | -2.00                                                     |            | -2.00      |                                             |            |            |
|                                  | <i>HD1555</i> | Phage terminase, large subunit                                              |                                                           |            |            |                                             | 2.99       |            |
|                                  | <i>HD1556</i> | Mu-like prophage FluMu protein gp29                                         |                                                           |            |            |                                             | 2.28       |            |
|                                  | <i>HD1576</i> | Phage FAD/FMN-containing dehydrogenase                                      |                                                           |            |            |                                             | 2.72       |            |
|                                  | <i>HD1622</i> | Conserved hypothetical protein                                              |                                                           |            |            |                                             |            | 2.89       |
|                                  | <i>HD1756</i> | Putative xanthine/uracil permease                                           |                                                           |            | -5.78      | 3.11                                        | 2.42       | 6.18       |
|                                  | <i>phnA</i>   | Alkylphosphonate utilization operon protein PhnA                            |                                                           |            | 2.05       |                                             |            | 3.87       |
|                                  | <i>plpR1</i>  | RstR-like phage repressor protein                                           |                                                           |            | 3.81       |                                             |            | 3.91       |
|                                  | <i>plpR2</i>  | RstR-like phage repressor protein                                           |                                                           |            | 3.93       |                                             |            | 4.00       |
|                                  | <i>sanA</i>   | SanA protein                                                                |                                                           |            | -3.86      |                                             |            | -4.44      |
|                                  | <i>slyX</i>   | SlyX-like protein                                                           |                                                           |            |            |                                             | -2.68      |            |
|                                  | <i>ykgE</i>   | Conserved putative dehydrogenase subunit                                    |                                                           |            | -2.78      |                                             |            |            |

<sup>a</sup>Does not include genes that encode hypothetical proteins.

<sup>b</sup>Genes or operons differentially regulated in 35000HPΔ*relA*Δ*spoT* versus 35000HP.

<sup>c</sup>Genes or operons differentially regulated in 35000HPΔ*dksA* versus 35000HP.
